# Supplementary material for: Role(s) of TMA in polymerization
Source: Royal Society of Chemistry journal article supplement (doi:10.1039/c5dt04895h), 2016-01-01
Supplement: c5dt04895h3.pdf [file c5dt04895h3.pdf]

# Supporting Information

## Role(s) of TMA in Polymerization

Christian Ehm,<sup>a\*</sup> R. Cipullo,<sup>a</sup> Peter H.M. Budzelaar<sup>b</sup> and Vincenzo Busico<sup>a</sup>

<sup>a</sup> Dipartimento di Scienze Chimiche, Università di Napoli Federico II, Via Cintia, 80126 Napoli,

Italy

<sup>b</sup> Department of Chemistry, University of Manitoba, Winnipeg, MB R3T 2N2, Canada

## Contents

|                                                                                                       |   |
|-------------------------------------------------------------------------------------------------------|---|
| A. Full Gaussian Citation.....                                                                        | 2 |
| B. Tables.....                                                                                        | 3 |
| B1. Tables with Final Energies, Enthalpy and Entropy corrections in Hartree for R=Me .....            | 3 |
| B2. Tables with Final Energies, Enthalpy and Entropy corrections in Hartree for R=iBu.....            | 3 |
| B3. Tables with Final Energies, Enthalpy and Entropy corrections in Hartree for small molecules ..... | 4 |

## A. Full Gaussian Citation.

Gaussian 09, Revision B.01, Frisch, M. J.; Trucks, G. W.; Schlegel, H. B.; Scuseria, G. E.; Robb, M. A.; Cheeseman, J. R.; Scalmani, G.; Barone, V.; Mennucci, B.; Petersson, G. A.; Nakatsuji, H.; Caricato, M.; Li, X.; Hratchian, H. P.; Izmaylov, A. F.; Bloino, J.; Zheng, G.; Sonnenberg, J. L.; Hada, M.; Ehara, M.; Toyota, K.; Fukuda, R.; Hasegawa, J.; Ishida, M.; Nakajima, T.; Honda, Y.; Kitao, O.; Nakai, H.; Vreven, T.; Montgomery, J. A., Jr.; Peralta, J. E.; Ogliaro, F.; Bearpark, M.; Heyd, J. J.; Brothers, E.; Kudin, K. N.; Staroverov, V. N.; Kobayashi, R.; Normand, J.; Raghavachari, K.; Rendell, A.; Burant, J. C.; Iyengar, S. S.; Tomasi, J.; Cossi, M.; Rega, N.; Millam, M. J.; Klene, M.; Knox, J. E.; Cross, J. B.; Bakken, V.; Adamo, C.; Jaramillo, J.; Gomperts, R.; Stratmann, R. E.; Yazyev, O.; Austin, A. J.; Cammi, R.; Pomelli, C.; Ochterski, J. W.; Martin, R. L.; Morokuma, K.; Zakrzewski, V. G.; Voth, G. A.; Salvador, P.; Dannenberg, J. J.; Dapprich, S.; Daniels, A. D.; Farkas, Ö.; Foresman, J. B.; Ortiz, J. V.; Cioslowski, J.; Fox, D. J. Gaussian, Inc., Wallingford CT, 2009.

## B. Tables

### B1. Tables with Final Energies, Enthalpy and Entropy corrections in Hartree for R=Me

| Structure       | TPSSTPSS-E   | H_corr     | TAS_corr | M06-2X-E     | M06-2X-E(PCM) |
|-----------------|--------------|------------|----------|--------------|---------------|
| 3_Me+           | -2052.573099 | 0.71161592 | 0.119763 | -2051.931147 | -2051.962145  |
| 5_Me+           | -2414.809299 | 0.82819891 | 0.143645 | -2414.100397 | -2414.13137   |
| 2_Me+           | -1690.319096 | 0.59541874 | 0.101432 | -1689.733983 | -1689.767485  |
| 6_Me+_propene_A | -1808.267039 | 0.681274   | 0.112763 | -1807.645282 | -1807.677207  |
| 6_Me+_propene_B | -1808.268601 | 0.68142808 | 0.111803 | -1807.645006 | -1807.677506  |
| 6_Me+_propene_C | -1808.269156 | 0.68118032 | 0.112787 | -1807.647022 | -1807.678269  |
| 6_Me+_propene_D | -1808.270909 | 0.68136457 | 0.112819 | -1807.649553 | -1807.680663  |

### B2. Tables with Final Energies, Enthalpy and Entropy corrections in Hartree for R=iBu

| Structure                         | TPSSTPSS-E   | H_corr     | TAS_corr | M06-2X-E     | M06-2X-E(PCM) |
|-----------------------------------|--------------|------------|----------|--------------|---------------|
| 2alpha_iBu+                       | -1808.272939 | 0.68294787 | 0.111604 | -1807.644172 | -1807.679176  |
| 2beta_iBu+                        | -1808.279797 | 0.68318998 | 0.109509 | -1807.653811 | -1807.688537  |
| 2gamma_iBu+                       | -1808.279163 | 0.68382475 | 0.109654 | -1807.653664 | -1807.685753  |
| 6alpha_iBu+_propene_A             | -1926.22491  | 0.76913874 | 0.120951 | -1925.56025  | -1925.591343  |
| 6alpha_iBu+_propene_B             | -1926.225856 | 0.7689516  | 0.121282 | -1925.56076  | -1925.591558  |
| 6alpha_iBu+_propene_C             | -1926.218131 | 0.76885853 | 0.122435 | -1925.551161 | -1925.582471  |
| 6alpha_iBu+_propene_D             | -1926.220729 | 0.76914686 | 0.121706 | -1925.555219 | -1925.586179  |
| 6beta_iBu+_propene_A              | -1926.221746 | 0.76961232 | 0.120222 | -1925.560071 | -1925.591172  |
| 6beta_iBu+_propene_B              | -1926.221612 | 0.76936827 | 0.119161 | -1925.560215 | -1925.591534  |
| 6beta_iBu+_propene_C              | -1926.219302 | 0.76906938 | 0.122927 | -1925.556346 | -1925.588192  |
| 6beta_iBu+_propene_D              | -1926.218647 | 0.76929562 | 0.122232 | -1925.557184 | -1925.589024  |
| 3_iBu+_A                          | -2170.52354  | 0.80000689 | 0.127229 | -2169.840337 | -2169.870714  |
| 3_iBu+_B                          | -2170.52723  | 0.79999947 | 0.127593 | -2169.843691 | -2169.874183  |
| 4beta_iBu+_A                      | -2170.515369 | 0.80011454 | 0.129539 |              |               |
| 4beta_iBu+_B                      | -2170.497578 | 0.79899064 | 0.12981  |              |               |
| 6alpha_iBu+_propene_InsertionTS_A | -1926.211552 | 0.76901046 | 0.116819 | -1925.541466 | -1925.571422  |
| 6alpha_iBu+_propene_InsertionTS_B | -1926.218405 | 0.76855471 | 0.117514 | -1925.551782 | -1925.581546  |
| 6beta_iBu+_propene_InsertionTS_A  | -1926.2052   | 0.76885974 | 0.116436 | -1925.539752 | -1886.272462  |
| 6beta_iBu+_propene_InsertionTS_B  | -1926.201968 | 0.76911844 | 0.115391 | -1925.535869 | -1925.569676  |
| 4alpha_iBu+_A                     | -2170.517783 | 0.79985954 | 0.12953  | -2169.833679 | -2169.864574  |
| 5alpha_iBu+_A                     | -2532.764017 | 0.91623272 | 0.150563 | -2532.016718 | -2532.046965  |
| 5alpha_iBu+_B                     | -2532.762821 | 0.9158978  | 0.151268 | -2532.011241 | -2532.041415  |
| 5alpha_iBu+_C                     | -2532.764192 | 0.9157031  | 0.15272  | -2532.01507  | -2532.045556  |
| 5alpha_iBu+_D                     | -2532.763986 | 0.91617986 | 0.151841 | -2532.017127 | -2532.04741   |
| 5alpha_iBu+_E                     | -2532.762762 | 0.91674499 | 0.150041 | -2532.0156   | -2532.046113  |
| 5alpha_iBu+_F                     | -2532.762766 | 0.91593986 | 0.150809 | -2532.011267 | -2532.041571  |

|               |              |            |          |              |              |
|---------------|--------------|------------|----------|--------------|--------------|
| 5alpha_iBu+_G | -2532.763    | 0.91604436 | 0.150837 | -2532.011842 | -2532.042368 |
| 5alpha_iBu+_H | -2532.764269 | 0.91585034 | 0.15195  | -2532.015517 | -2532.045887 |

### B3. Tables with Final Energies, Enthalpy and Entropy corrections in Hartree for small molecules

| <b>Structure</b> | <b>TPSSTPSS-E</b> | <b>H_corr</b> | <b>TΔS_corr</b> | <b>M06-2X-E</b> | <b>M06-2X-E(PCM)</b> |
|------------------|-------------------|---------------|-----------------|-----------------|----------------------|
| TMA DIMER        | -724.4689441      | 0.230015129   | 0.060723        | -724.3326661    | -724.3340118         |
| AlMe3            | -362.221393       | 0.113661992   | 0.042166992     | -362.148569     | -362.1496104         |
| ethene           | -78.60514788      | 0.054247884   | 0.026216        | -78.57115492    | -78.5718058          |
| propene          | -117.932912       | 0.083400953   | 0.030104        | -117.8827427    | -117.8834133         |
